# Supplementary material
Source: PubMed Central journal article supplement (PMC3542902)
Supplement: Supp_Fig1.pdf [file Supp_Fig1.pdf]

## Supplementary Data

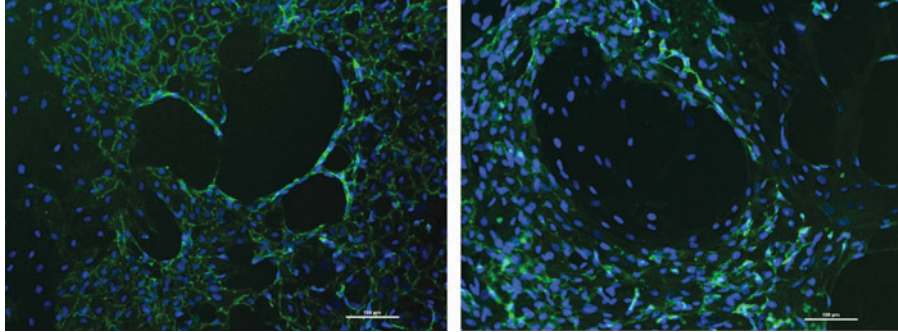

**SUPPLEMENTARY FIG. S1.** Immunostaining of cells in the 1:4 coculture. CD31-positive cells, considered EC, form a lumen-like structure. EC, endothelial cells.
